# Supplementary material for: Association of Interprofessional Discharge Planning Using an Electronic Health Record Tool With Hospital Length of Stay Among Patients with Multimorbidity: A Nonrandomized Controlled Trial
Source: PubMed Central journal article supplement (PMC9520366; doi:10.1001/jamanetworkopen.2022.33667), 2022-09-28
Supplement: jamanetwopen-e2233667-s003.pdf [file jamanetwopen-e2233667-s003.pdf]

## **Data Sharing Statement**

Kutz. Association of Interprofessional Discharge Planning Using an Electronic Health Record Tool With Hospital Length of Stay Among Patients with Multimorbidity. *JAMA Netw Open*. Published September 28, 2022. doi:10.1001/jamanetworkopen.2022.33667

### **Data**

**Data available:** No
